# Supplementary material for: Use of “MGE Enhancers” for Labeling and Selection of Embryonic Stem Cell-Derived Medial Ganglionic Eminence (MGE) Progenitors and Neurons
Source: PLOS journal article supplement (doi:10.1371/journal.pone.0061956), 2013-05-01
Supplement: S3 (10.1371/journal.pone.0061956.s003) [file journal.pone.0061956.s003]

Unsupervised Heatmap

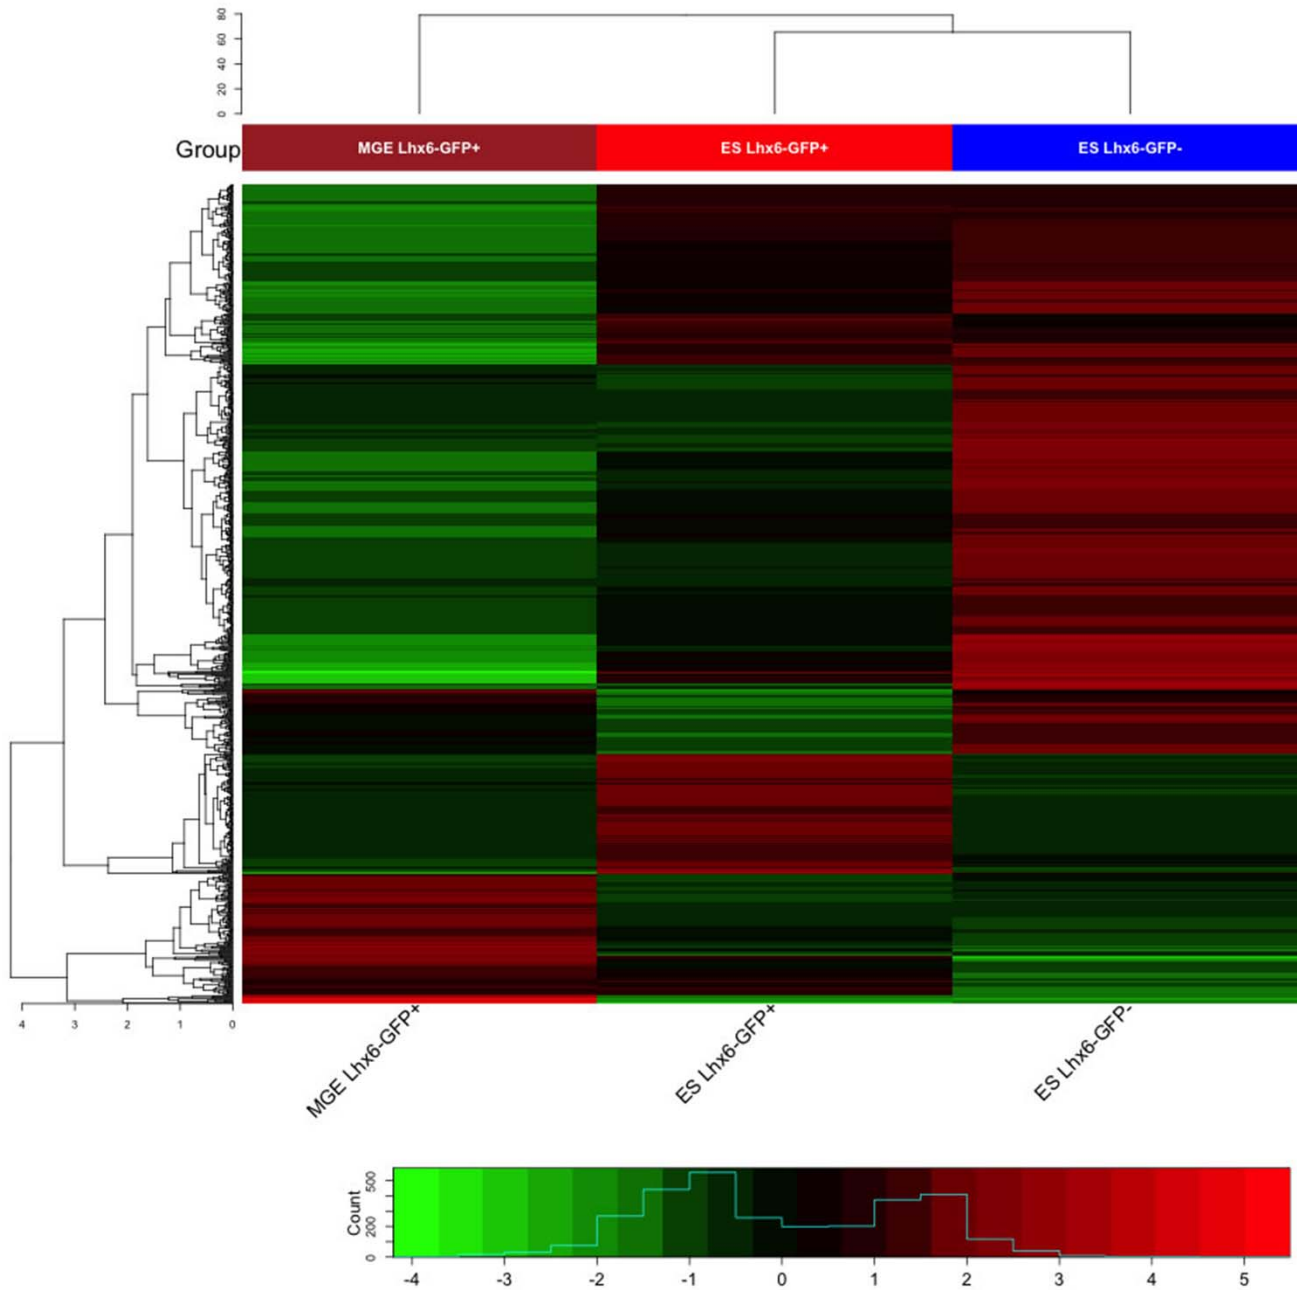

**Figure S12: Unsupervised clustering showing 1000 most variable probes .**

Microarray comparison of RNA expression from primary E12.5 MGE Lhx6-GFP+ cells, ES-Lhx6-GFP+ and ES-Lhx6-GFP- cells. Show here are 1000 most variable probes.

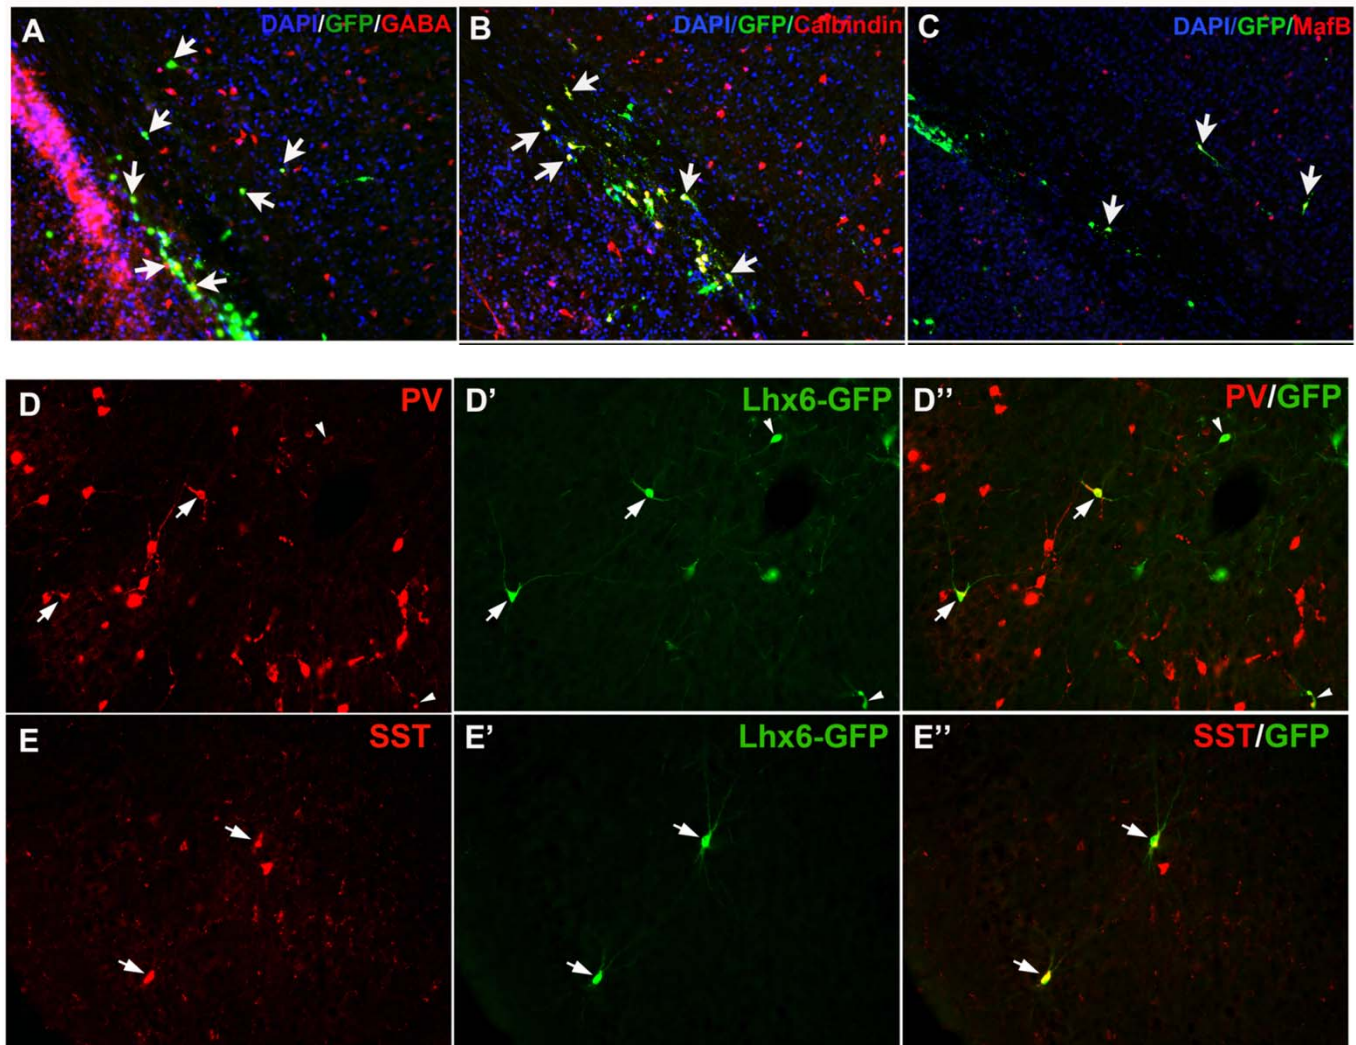

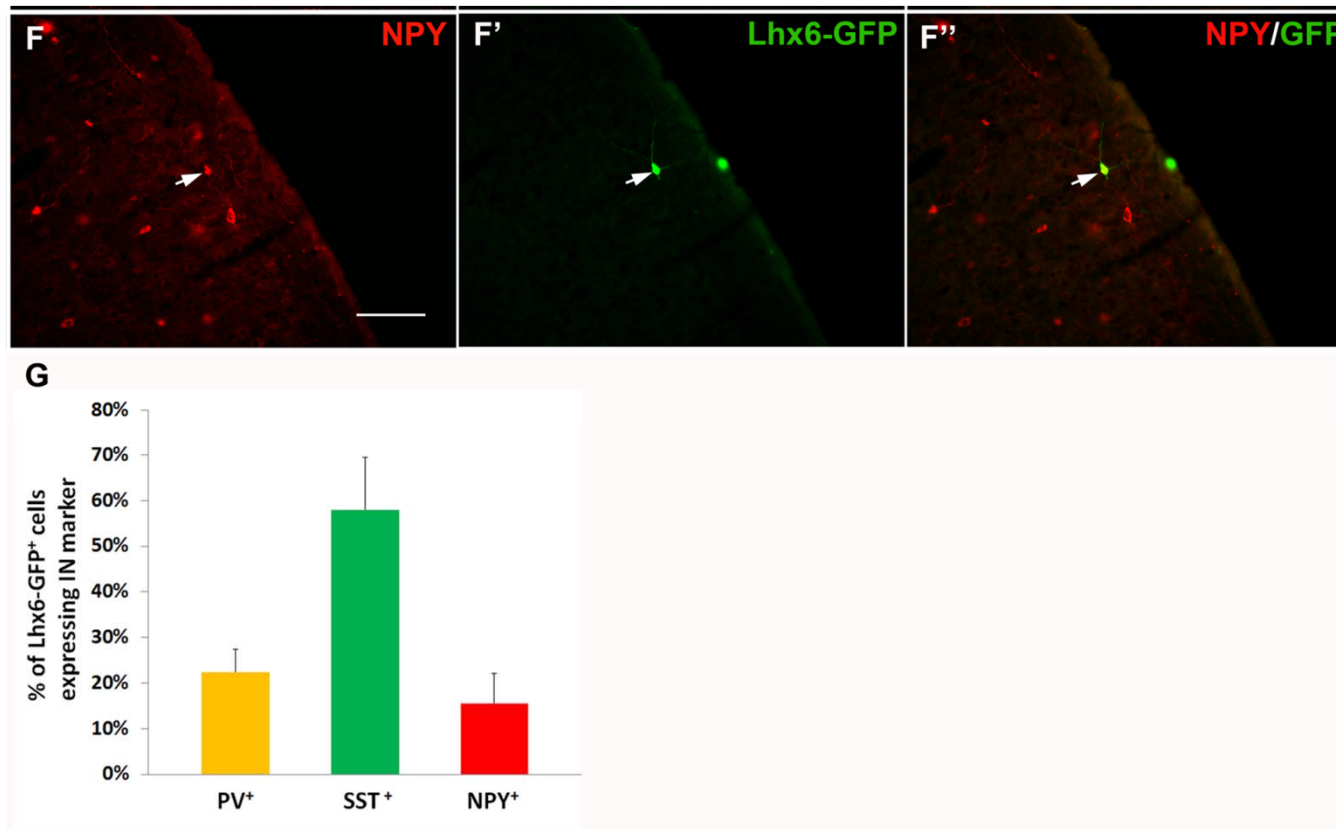

**Figure S13: Transplanted Lhx6-GFP<sup>+</sup> cells express cortical interneuron markers in the cortex.**

(A-C) Four days after transplantation, some of the Lhx6-GFP<sup>+</sup> cells were also GABA<sup>+</sup> (A), Calbindin<sup>+</sup> (B), or MafB<sup>+</sup> (C). White arrows indicate double positive cells. (D-F'') Sixty-nine days after transplantation, Lhx6-GFP<sup>+</sup> cells expressed parvalbumin (PV) (D, D', D''), somatostatin (SST) (E, E', E'') and neuropeptide Y (NPY) (F, F', F''). Arrows indicate markers co-labeling. In PV/GFP co-staining, there were some GFP<sup>+</sup> cells that have weak PV expression (white arrowheads). Scale bar, 100μm. (G) Average (data are mean ± SEM) percentages of parvalbumin<sup>+</sup> (PV<sup>+</sup>/GFP<sup>+</sup>), somatostatin<sup>+</sup> (SST<sup>+</sup>/GFP<sup>+</sup>), neuropeptide Y<sup>+</sup> (NPY<sup>+</sup>/GFP<sup>+</sup>) cells among all Lhx6-GFP<sup>+</sup> cells (n=3-4).

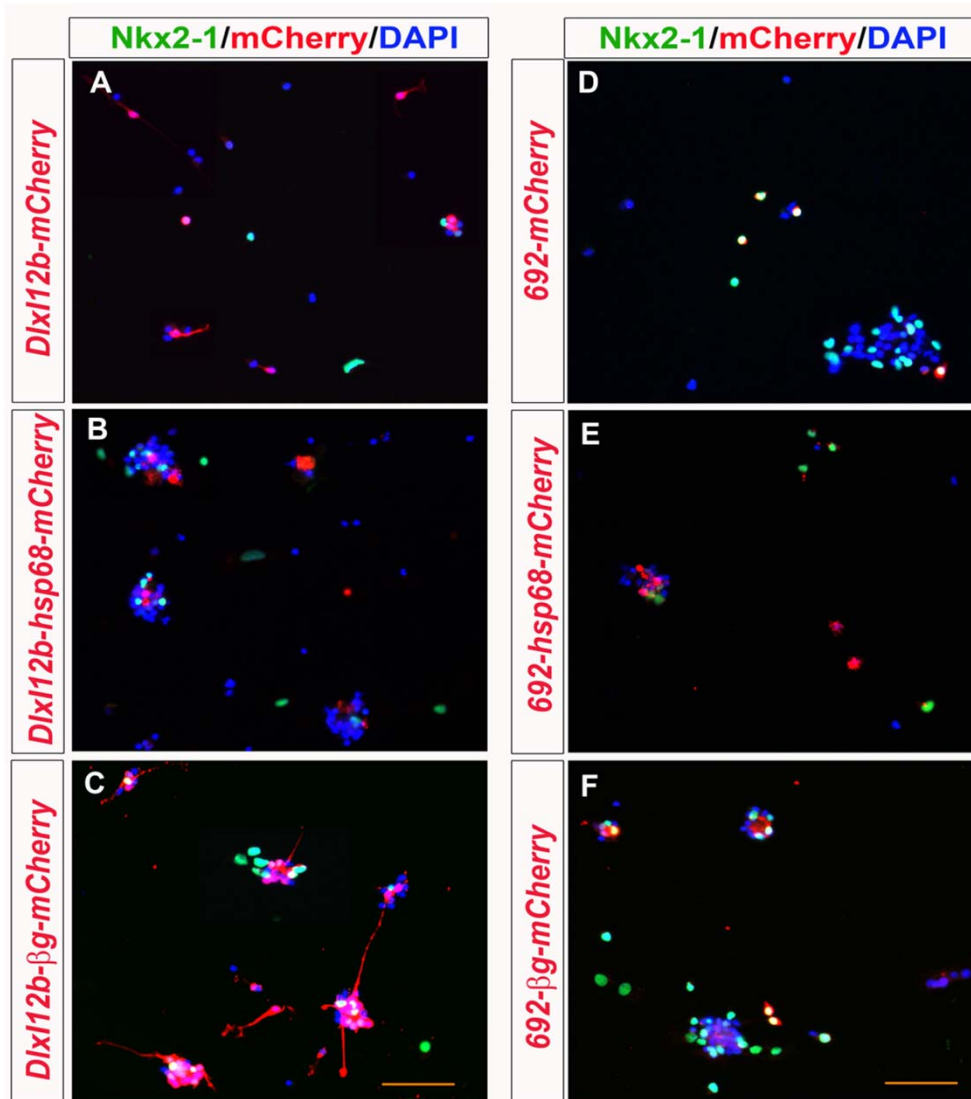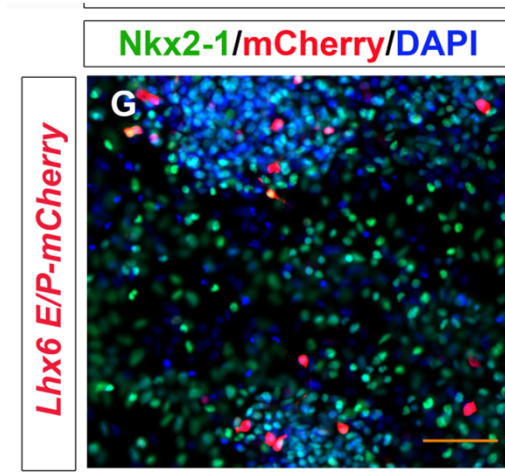

**Figure S14: Test of lentiviral constructs in dissociated primary MGE cells.**

Dissociated primary MGE cells (E13.5) were infected with each of the lentiviruses indicated (A: *Dlx12b-mCherry*, B: *Dlx12b-hsp68-mCherry*, C: *Dlx12b-βg-mCherry*, D: *692-mCherry*, E: *692-hsp68-mCherry*, F: *692-βg-mCherry*, G: *Lhx6-E/P-mCherry*) for three days before being fixed for immunostaining. Pictures are composites from several different fields (A-F) or from one single field (G). Shown here are Nkx2-1 staining in green, mCherry in red, and DAPI nuclear stain in blue. Scale bar, 50μm.
